# Supplementary material for: Oral Selective TLR8 Agonist Selgantolimod Induces Multiple Immune Cell Responses in Humans
Source: MDPI journal article supplement (doi:10.3390/v13122400), 2021-11-30
Supplement: s1 [file s1]

## Supplementary Materials

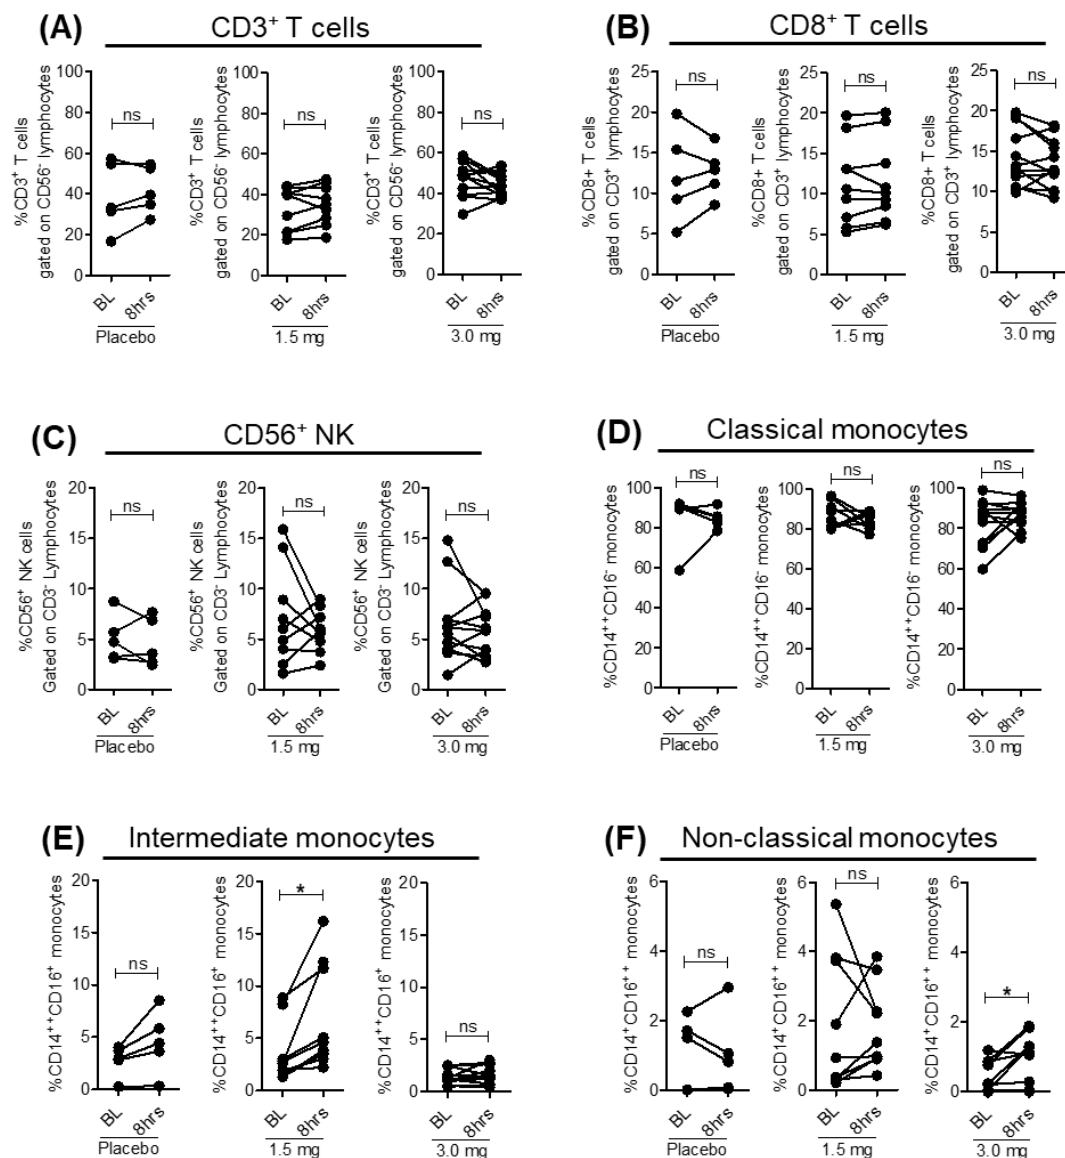

**Figure S1. Frequencies of peripheral blood immune cells after oral-SLGN administration in healthy subjects.** Flow cytometric analysis of PBMCs from BL (Pre) and 8hrs post-treatment) from individuals administered placebo (n=5) or indicated dosage of SLGN (1.5 mg (n=9) and 3.0 mg (n=12)). Comparative analyses of frequencies of immune cell subsets from baseline and 8-hour samples in placebo or SLGN-treated individuals for (A) CD3<sup>+</sup> T, (B) CD8<sup>+</sup> T, (C) CD56<sup>+</sup> NK and monocyte subsets (D) CD14<sup>+</sup>CD16<sup>-</sup> classical monocytes, (E) CD14<sup>+</sup>CD16<sup>+</sup> intermediate monocytes and (F) CD14<sup>+</sup>CD16<sup>++</sup> non-classical monocytes are shown. Significance calculated by Wilcoxon matched-pairs signed rank test . P values ≤0.05\* indicates the statistical significance. ns; no significance.

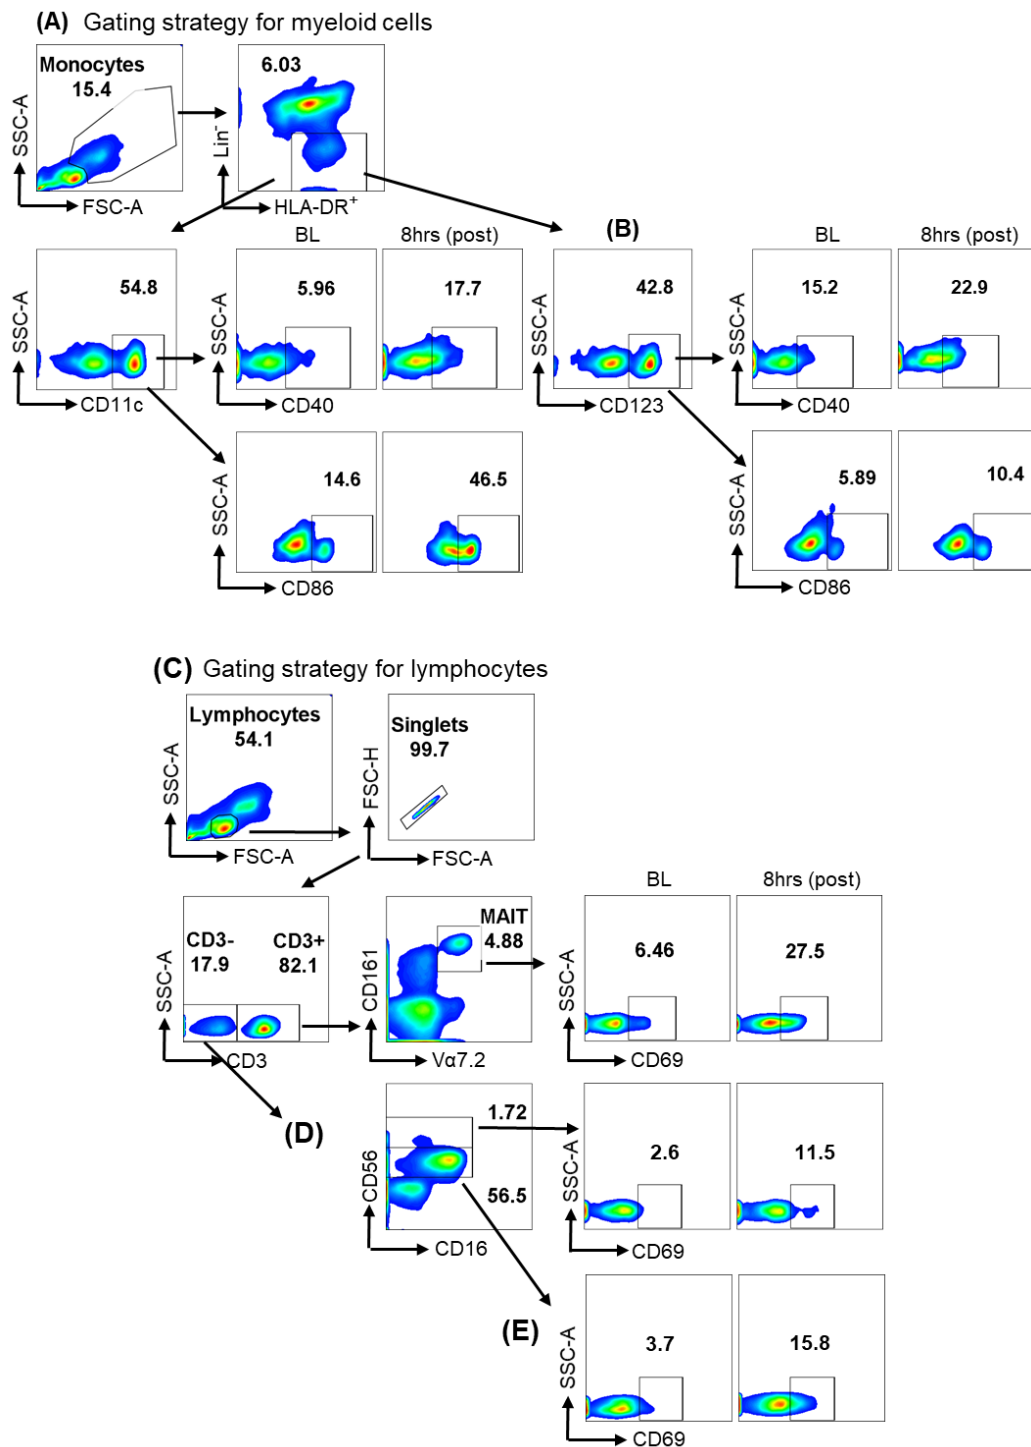

**Figure S2. Activation of myeloid and lymphoid cells after oral-SLGN treatment in healthy subjects.** (A-B) Gating strategy for myeloid cells shows the expression of CD40 and CD86 on Lin<sup>+</sup>HLA-DR<sup>+</sup>CD11c<sup>+</sup> mDCs and Lin<sup>+</sup>HLA-DR<sup>+</sup>CD123<sup>+</sup> pDCs respectively from baseline and 8hrs post-SLGN (3.0 mg) treated individuals. (C-E) Gating strategy for lymphocytes displays the cell surface expression of CD69 on MAIT, CD56<sup>bright</sup> and CD56<sup>dim</sup> NK cell subsets. BL; baseline.

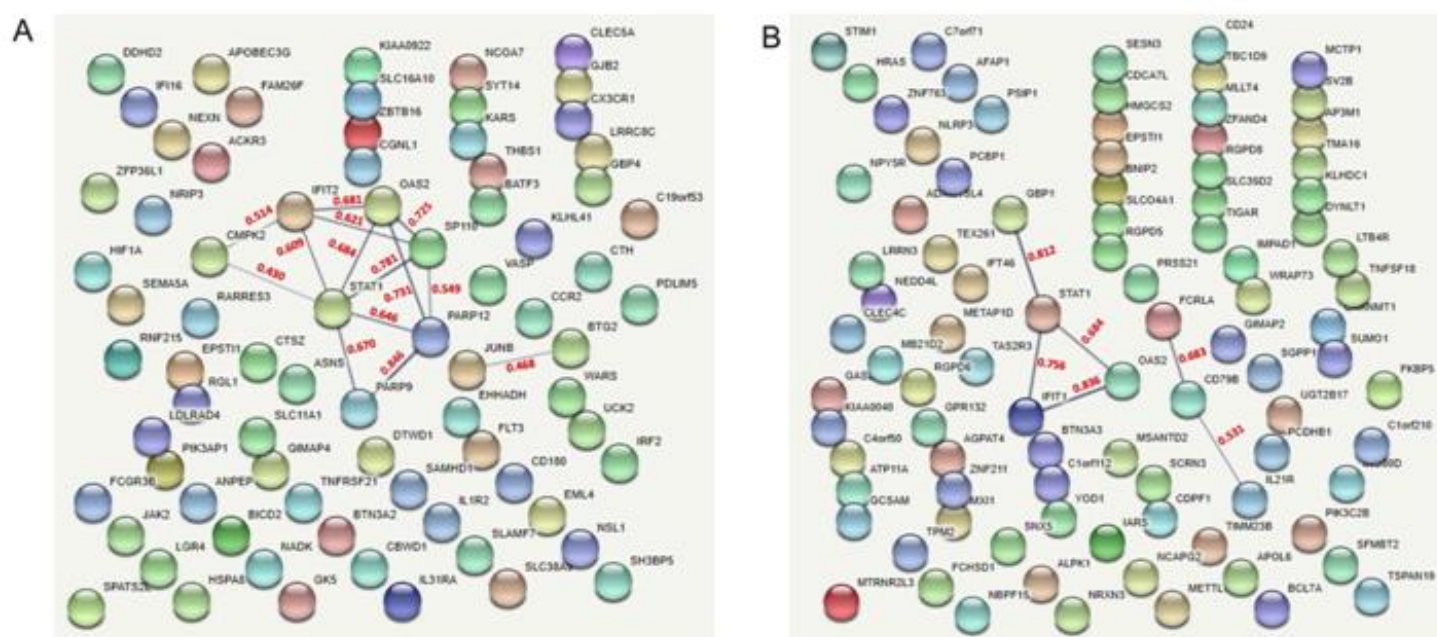

**Figure S3. Protein-protein interaction networks** were generated using STRING online tool ([string-db.org](http://string-db.org)) with medium confidence score  $\geq 0.4$ . (A) Interaction network based on co-expression evidence with DEGs among monocytes. (B) Interaction network based on co-expression evidence with DEGs among lymphocytes. The interaction network is created with nodes as the gene/protein and edges as significant evidence from publicly available co-expression data accessible to STRING. The width and the numbers associated with the edges represents the confidence scores of the co-expression-based interactions.

**Table S1:** List of flow cytometry antibodies

| SL No. | Flow Panel  | Markers                                  | Fluorochrome    | Clone                               | Company   | Cat. #            |             |        |
|--------|-------------|------------------------------------------|-----------------|-------------------------------------|-----------|-------------------|-------------|--------|
| 1      | MAIT        | CD69                                     | FITC            | FN50                                | Biolegend | 310904            |             |        |
| 2      |             |                                          | CD161           | PE                                  | 191B8     | Milteny i Bio tec | 130-113-593 |        |
| 3      |             |                                          | CD38            | PerCp/Cy5.5                         | HIT2      | Biolegend         | 303522      |        |
| 4      |             |                                          | Vα7.2           | PE/Cy7                              | 3C10      | Biolegend         | 351712      |        |
| 5      |             |                                          | Granzyme B      | APC                                 | QA16A02   | Biolegend         | 372204      |        |
| 6      |             |                                          | CD8a            | BV 605                              | RPA-T8    | Biolegend         | 301040      |        |
| 7      |             |                                          | CD3             | APC/Cy7                             | OKT3      | Biolegend         | 317342      |        |
| 8      |             |                                          | Live/Dead Aqua  | APC/Cy7                             | ---       | Thermo Fisher     | L34965      |        |
| 9      | NK          | Perforin                                 | FITC            | B-D48                               | Biolegend | 353310            |             |        |
| 10     |             |                                          | CD16            | PE/Cy7                              | 3G8       | Biolegend         | 302016      |        |
| 11     |             |                                          | Granzyme B      | BV 421                              | GB11      | BD Biosciences    | 563389      |        |
| 12     |             |                                          | CD56            | BV 510                              | HCD56     | Biolegend         | 318340      |        |
| 13     |             | CD69                                     | BV 605          | FN50                                | Biolegend | 310938            |             |        |
| 14     | Cytokines   | IL-1β                                    | FITC            | JK1B-1                              | Biolegend | 508206            |             |        |
| 15     |             |                                          | IL-18           | PE                                  | 74801     | R&D Systems       | IC646P      |        |
| 16     |             |                                          | IL-12/IL-23 p40 | PerCp/Cy5.5                         | C11.5     | Biolegend         | 501822      |        |
| 17     |             |                                          | CD14            | BV 421                              | M5E2      | Biolegend         | 301830      |        |
| 18     |             | IL-6                                     | APC             | MQ2-13A5                            | Biolegend | 501112            |             |        |
| 19     |             | TNFα                                     | BV 510          | MAb11                               | Biolegend | 502950            |             |        |
| 20     | mDCs / pDCs | CD11c                                    | BV 605          | 3.9                                 | Biolegend | 301636            |             |        |
| 21     |             | Lineage Cocktail<br>(CD3/14/16/19/20/56) | FITC            | UCHT1/HCD14/3G8/HIB19/<br>2H7/HCD56 | Biolegend | 348801            |             |        |
| 22     |             |                                          |                 | CD123                               | PE        | 6H6               | Biolegend   | 306006 |
| 23     |             |                                          |                 | CD86                                | BV 421    | IT2.2             | Biolegend   | 305426 |
| 24     |             |                                          | HLA-DR          | BV 510                              | L243      | Biolegend         | 307646      |        |
| 25     |             | CD40                                     | APC/Cy7         | 5C3                                 | Biolegend | 334324            |             |        |
| 26     | Monocytes   | HLA-DR                                   | PE              | L243                                | Biolegend | 307606            |             |        |
| 27     |             |                                          | CD14            | PerCp/Cy5.5                         | 63D3      | Biolegend         | 367110      |        |
| 28     |             |                                          | CD16            | BV 605                              | 3G8       | Biolegend         | 302040      |        |

**Table S2: List of genes deregulated in monocytes with 8 hr Selgantolimod treatment**

| Gene symbols | Mean exp (post-treatment, log2) | Variance (post-treatment) | Mean exp (pre-treatment, log2) | Variance (pre-treatment) | Fold Change (Log2) | p-value | Probe_IDs    |
|--------------|---------------------------------|---------------------------|--------------------------------|--------------------------|--------------------|---------|--------------|
| IFIT2        | 11.54                           | 3.02                      | 8.42                           | 0.6                      | 3.12               | 0.04725 | NM_001547    |
| CX3CR1       | 11.31                           | 0.54                      | 8.53                           | 2.64                     | 2.78               | 0.0165  | NM_001171171 |
| OAS2         | 10.71                           | 1.22                      | 8.48                           | 1.53                     | 2.24               | 0.03715 | NM_001032731 |
| WARS         | 15.84                           | 0.72                      | 13.73                          | 0.9                      | 2.11               | 0.03929 | NM_004184    |
| GIMAP4       | 9.44                            | 1.26                      | 7.38                           | 0.94                     | 2.06               | 0.03786 | NM_018326    |
| FCGR3B       | 10.7                            | 0.31                      | 8.64                           | 2.85                     | 2.05               | 0.04865 | NM_000570    |
| PARP9        | 12.7                            | 1.65                      | 10.8                           | 0.98                     | 1.91               | 0.01987 | NM_001146102 |
| GBP4         | 10.59                           | 0.47                      | 8.86                           | 0.18                     | 1.73               | 0.01029 | NM_052941    |
| BTG2         | 10.79                           | 0.23                      | 9.08                           | 0.55                     | 1.72               | 0.0297  | NM_006763    |
| RARRES3      | 13.13                           | 0.58                      | 11.45                          | 0.31                     | 1.68               | 0.04772 | NM_004585    |
| CD180        | 10.96                           | 0.86                      | 9.34                           | 0.23                     | 1.62               | 0.00802 | NM_005582    |
| JUNB         | 13.63                           | 0.5                       | 12.03                          | 0.28                     | 1.6                | 0.00541 | NM_002229    |
| BTN3A2       | 13.48                           | 0.08                      | 11.93                          | 0.57                     | 1.55               | 0.02544 | NM_001197246 |
| LRRC8C       | 9.09                            | 0.32                      | 7.62                           | 0.65                     | 1.47               | 0.03472 | NM_032270    |
| PSMB8-AS1    | 11.83                           | 0.02                      | 10.37                          | 0.62                     | 1.46               | 0.03375 | NR_037173    |
| PARP12       | 13.01                           | 0.57                      | 11.58                          | 0.31                     | 1.44               | 0.02439 | NM_022750    |
| KIAA0922     | 11.34                           | 0.39                      | 9.91                           | 0.28                     | 1.43               | 0.03744 | NM_001131007 |
| SLAMF7       | 10.14                           | 0.81                      | 8.71                           | 0.11                     | 1.43               | 0.03279 | NM_001282588 |
| IRF2         | 11.33                           | 0.55                      | 9.93                           | 0.06                     | 1.41               | 0.01101 | NM_002199    |
| IFI16        | 14.09                           | 0.83                      | 12.69                          | 0.63                     | 1.4                | 0.01569 | NM_001206567 |
| STAT1        | 12.47                           | 0.8                       | 11.07                          | 0.35                     | 1.4                | 0.03358 | NM_007315    |
| CTSZ         | 11.26                           | 0.29                      | 9.88                           | 0.46                     | 1.37               | 0.02049 | NM_001336    |
| SP110        | 11.63                           | 0.48                      | 10.27                          | 0.18                     | 1.36               | 0.0291  | NM_001185015 |
| NEXN         | 8.47                            | 1.21                      | 7.13                           | 0.51                     | 1.34               | 0.02245 | NM_001172309 |
| VASP         | 13.27                           | 0.05                      | 11.93                          | 0.45                     | 1.33               | 0.02711 | NM_003370    |
| SAMHD1       | 12.51                           | 0.21                      | 11.19                          | 0.42                     | 1.32               | 0.02501 | NM_015474    |
| SPATS2L      | 10.2                            | 1.05                      | 8.9                            | 0.14                     | 1.3                | 0.03679 | NM_001100422 |
| DTWD1        | 8.2                             | 0.09                      | 6.93                           | 0.25                     | 1.27               | 0.03705 | NM_001144955 |
| HSPA8        | 17.59                           | 0.44                      | 16.33                          | 0.36                     | 1.26               | 0.01394 | NM_006597    |
| JAK2         | 13.03                           | 0.55                      | 11.77                          | 0.11                     | 1.26               | 0.01623 | NM_004972    |
| APOBEC3G     | 8.5                             | 0.45                      | 7.27                           | 0.08                     | 1.23               | 0.02541 | NM_021822    |
| IL31RA       | 7.76                            | 1.46                      | 6.54                           | 0.41                     | 1.22               | 0.02785 | NM_001242636 |
| EML4         | 11.11                           | 0.04                      | 9.91                           | 0.59                     | 1.2                | 0.0381  | NM_001145076 |
| NADK         | 11.61                           | 0.04                      | 10.43                          | 0.46                     | 1.18               | 0.04561 | NM_001198993 |
| EPSTI1       | 9.08                            | 0.72                      | 7.9                            | 1.12                     | 1.18               | 0.04239 | NM_001002264 |
| CMPK2        | 9.53                            | 1.6                       | 8.35                           | 1.09                     | 1.18               | 0.01152 | NM_001256477 |
| CCR2         | 10.4                            | 1.06                      | 9.22                           | 0.89                     | 1.18               | 0.0347  | NM_001123041 |
| CBWD1        | 13.74                           | 0.15                      | 12.58                          | 0.14                     | 1.16               | 0.03609 | NM_001145355 |
| NSL1         | 8.46                            | 0.05                      | 7.31                           | 0.49                     | 1.15               | 0.03248 | NM_001042549 |
| FAM26F       | 7.6                             | 0.2                       | 6.51                           | 0.1                      | 1.1                | 0.04689 | NM_001010919 |
| ZFP36L1      | 14.47                           | 0.46                      | 13.37                          | 0.63                     | 1.1                | 0.01825 | NM_001244698 |
| BATF3        | 8.99                            | 0.11                      | 7.9                            | 0.04                     | 1.09               | 0.02586 | NM_018664    |
| SLC38A9      | 6.08                            | 0.11                      | 4.98                           | 0.21                     | 1.09               | 0.02241 | NM_001258286 |
| RGL1         | 9.44                            | 0.38                      | 8.38                           | 0.23                     | 1.07               | 0.02096 | NM_001297669 |
| BICD2        | 7.21                            | 0.05                      | 6.14                           | 0.21                     | 1.07               | 0.0408  | NM_001003800 |
| NCOA7        | 9.13                            | 0.4                       | 8.07                           | 0.2                      | 1.06               | 0.01707 | NM_001122842 |
| C19orf53     | 10.08                           | 0.06                      | 9.03                           | 0.58                     | 1.04               | 0.03758 | NM_014047    |

|           |       |      |       |      |       |         |                  |
|-----------|-------|------|-------|------|-------|---------|------------------|
| PDLIM5    | 9.15  | 0.12 | 8.12  | 0.27 | 1.03  | 0.04112 | NM_001011513     |
| KARS      | 12.72 | 0.3  | 11.7  | 0.13 | 1.02  | 0.02419 | NM_001130089     |
| PIK3AP1   | 13.5  | 0.12 | 12.48 | 0.57 | 1.02  | 0.03716 | NM_152309        |
| UCK2      | 5.27  | 0.11 | 6.28  | 0.01 | -1    | 0.00577 | hsa_circ_0007260 |
| LGR4      | 6.32  | 0.23 | 7.33  | 0.01 | -1.01 | 0.03915 | NM_018490        |
| LDLRAD4   | 10.36 | 0.28 | 11.39 | 0.35 | -1.02 | 0.02139 | NM_001003674     |
| MIR670HG  | 5.11  | 0.14 | 6.14  | 0.31 | -1.03 | 0.0053  | NR_131246        |
| EHHADH    | 6.85  | 0.15 | 7.87  | 0.15 | -1.03 | 0.0355  | NM_001166415     |
| DDHD2     | 6     | 0.45 | 7.04  | 0.06 | -1.04 | 0.03829 | NM_001164232     |
| CGNL1     | 4.68  | 0.1  | 5.72  | 0.37 | -1.04 | 0.0413  | NM_001252335     |
| SH3BP5    | 9.38  | 0.62 | 10.45 | 0.44 | -1.07 | 0.00427 | NM_001018009     |
| CTH       | 6.72  | 0.21 | 7.79  | 0.43 | -1.07 | 0.02525 | NM_001190463     |
| NRIP3     | 6.81  | 1.05 | 7.89  | 1.83 | -1.08 | 0.03981 | NM_020645        |
| SEMA5A    | 5.32  | 0.08 | 6.41  | 0.1  | -1.09 | 0.01816 | NM_003966        |
| LINC01089 | 8.75  | 0.32 | 9.83  | 0.01 | -1.09 | 0.04524 | NR_002809        |
| RNF215    | 4.68  | 0.05 | 5.77  | 0.09 | -1.09 | 0.02051 | ENST00000619645  |
| SLC11A1   | 13.23 | 0.28 | 14.38 | 0.01 | -1.15 | 0.02365 | NM_000578        |
| KLHL41    | 4.07  | 0.12 | 5.27  | 0.33 | -1.19 | 0.00237 | NM_006063        |
| ASNS      | 5.79  | 0.07 | 6.98  | 0.36 | -1.19 | 0.03893 | NM_001178075     |
| SYT14     | 5.45  | 0.21 | 6.67  | 0.02 | -1.22 | 0.01812 | NM_001146261     |
| HIF1A     | 14.98 | 0.66 | 16.26 | 1    | -1.28 | 0.02072 | NM_001243084     |
| ANPEP     | 14.32 | 0.27 | 15.64 | 0.59 | -1.32 | 0.00596 | NM_001150        |
| SLC16A10  | 6.11  | 0.13 | 7.51  | 1.18 | -1.4  | 0.0488  | NM_018593        |
| CLEC5A    | 9.37  | 1.35 | 10.82 | 1.25 | -1.45 | 0.00144 | NM_001301167     |
| FLT3      | 6.46  | 0    | 7.93  | 0.74 | -1.47 | 0.04375 | NM_004119        |
| GK5       | 9.32  | 0.19 | 10.84 | 0.17 | -1.52 | 0.02377 | NM_001039547     |
| ACKR3     | 7.31  | 0.1  | 8.83  | 0.94 | -1.52 | 0.03567 | NM_020311        |
| IL1R2     | 8.65  | 0.47 | 10.18 | 0.57 | -1.53 | 0.0189  | NM_001261419     |
| GJB2      | 7.97  | 0.15 | 9.53  | 1.36 | -1.57 | 0.04573 | NM_004004        |
| ZBTB16    | 7.11  | 0.06 | 8.92  | 0.43 | -1.82 | 0.00536 | NM_001018011     |
| TNFRSF21  | 7.79  | 0.2  | 10.08 | 1.31 | -2.3  | 0.01518 | NM_014452        |
| THBS1     | 13.39 | 1.58 | 16.94 | 0.07 | -3.55 | 0.01783 | NM_003246        |

**Table S3: List of genes deregulated in lymphocytes with 8 hr Selgantolimod treatment**

| Gene symbols | Mean exp (pre-treatment, log2) | Variance (pre-treatment) | Mean exp (post-treatment, log2) | Variance (post-treatment) | Fold Change (Log2) | p-value | Probe_IDs    |
|--------------|--------------------------------|--------------------------|---------------------------------|---------------------------|--------------------|---------|--------------|
| STAT1        | 9.69                           | 0.89                     | 11.66                           | 0.76                      | 1.98               | 0.02209 | NM_007315    |
| GBP1         | 7.86                           | 0.17                     | 9.34                            | 0.21                      | 1.49               | 0.00297 | NM_002053    |
| PSIP1        | 9.56                           | 0.04                     | 11.03                           | 0.07                      | 1.47               | 0.00014 | NM_001128217 |
| KIAA0040     | 9.82                           | 0.42                     | 11.21                           | 0.15                      | 1.39               | 0.01453 | NM_001162893 |
| LRRN3        | 9.09                           | 0.45                     | 10.27                           | 0.31                      | 1.18               | 0.03635 | NM_001099658 |
| OAS2         | 7.43                           | 0.09                     | 8.5                             | 0.39                      | 1.07               | 0.03384 | NM_001032731 |
| IFIT1        | 5.67                           | 0.1                      | 6.72                            | 0.31                      | 1.05               | 0.02332 | NM_001270927 |
| C7orf71      | 5.76                           | 0.25                     | 6.79                            | 0.24                      | 1.03               | 0.02632 | NM_001145531 |
| CD79B        | 9.96                           | 0.05                     | 10.97                           | 0.44                      | 1.02               | 0.04874 | NM_000626    |
| GCSAM        | 8.19                           | 0.34                     | 9.15                            | 0.07                      | 0.96               | 0.03838 | NM_001190259 |
| NRXN3        | 5.31                           | 0.19                     | 6.22                            | 0.21                      | 0.91               | 0.02754 | NM_001105250 |
| BTN3A3       | 11.43                          | 0.27                     | 12.3                            | 0.12                      | 0.87               | 0.03734 | NM_001242803 |
| AFAP1        | 5.42                           | 0.04                     | 6.24                            | 0.24                      | 0.82               | 0.03716 | NM_001134647 |
| AP3M1        | 10.59                          | 0.15                     | 11.41                           | 0.23                      | 0.82               | 0.03915 | NM_012095    |
| C1orf112     | 8.66                           | 0.1                      | 9.44                            | 0.26                      | 0.78               | 0.04808 | NM_018186    |
| NCAPG2       | 6.43                           | 0.06                     | 7.2                             | 0.12                      | 0.77               | 0.01298 | NM_001281932 |
| FCRLA        | 10.56                          | 0.03                     | 11.31                           | 0.09                      | 0.76               | 0.0087  | NM_001184866 |
| MSANTD2      | 6.96                           | 0                        | 7.72                            | 0.13                      | 0.76               | 0.02364 | NM_001308027 |
| PCBP1        | 11.77                          | 0.11                     | 12.54                           | 0.05                      | 0.76               | 0.01121 | NM_006196    |
| METTL7A      | 10.47                          | 0.23                     | 11.22                           | 0.12                      | 0.75               | 0.04724 | NM_014033    |
| CARNMT1      | 10.22                          | 0.15                     | 10.95                           | 0.04                      | 0.74               | 0.02275 | NM_152420    |
| CD24         | 7.32                           | 0.1                      | 8.06                            | 0.19                      | 0.74               | 0.03577 | NM_001291737 |
| SGPP1        | 6.37                           | 0.03                     | 7.1                             | 0.02                      | 0.73               | 0.00054 | NM_030791    |
| TSPAN19      | 4.66                           | 0.07                     | 5.37                            | 0.2                       | 0.71               | 0.04332 | NM_001100917 |
| STIM1        | 9.89                           | 0.08                     | 10.59                           | 0                         | 0.7                | 0.01297 | NM_001277961 |
| CDPF1        | 7.13                           | 0.21                     | 7.82                            | 0.05                      | 0.69               | 0.04827 | NM_207327    |
| NPY5R        | 6.31                           | 0.01                     | 7                               | 0.12                      | 0.68               | 0.0245  | NM_006174    |
| EPSTI1       | 7.27                           | 0.18                     | 7.93                            | 0.06                      | 0.67               | 0.04237 | NM_001002264 |
| NEDD4L       | 6.7                            | 0.09                     | 7.38                            | 0.07                      | 0.67               | 0.01549 | NM_001144964 |
| MB21D2       | 6.3                            | 0.11                     | 6.98                            | 0.15                      | 0.67               | 0.03899 | NM_178496    |
| TBC1D9       | 6.51                           | 0.05                     | 7.18                            | 0.05                      | 0.67               | 0.0049  | NM_015130    |
| APOL6        | 7.45                           | 0.04                     | 8.08                            | 0.16                      | 0.63               | 0.04155 | NM_030641    |
| MLLT4        | 5.76                           | 0.06                     | 6.4                             | 0.17                      | 0.63               | 0.04769 | NM_001040000 |
| METAP1D      | 6.35                           | 0.13                     | 6.97                            | 0.12                      | 0.62               | 0.04911 | NM_199227    |
| C1orf210     | 8.02                           | 0.14                     | 8.64                            | 0.1                       | 0.62               | 0.04715 | NM_001164829 |
| YOD1         | 6.5                            | 0.07                     | 7.11                            | 0.11                      | 0.61               | 0.02898 | NM_001276320 |
| IFT46        | 7.48                           | 0.06                     | 8.08                            | 0.07                      | 0.61               | 0.0157  | NM_001168618 |
| SUMO1        | 10.76                          | 0.04                     | 11.37                           | 0.12                      | 0.61               | 0.0301  | NM_001005781 |
| HMGCS2       | 4.55                           | 0.05                     | 5.16                            | 0.12                      | 0.61               | 0.03136 | NM_001166107 |
| TAS2R3       | 5.51                           | 0.13                     | 6.12                            | 0.11                      | 0.61               | 0.04941 | NM_016943    |
| CDCA7L       | 9.37                           | 0.14                     | 9.99                            | 0.05                      | 0.61               | 0.03924 | NM_001127370 |
| BCL7A        | 5.71                           | 0.01                     | 6.31                            | 0.09                      | 0.6                | 0.02313 | NM_001024808 |
| PIK3C2B      | 6.74                           | 0.1                      | 7.34                            | 0.09                      | 0.6                | 0.03252 | NM_002646    |
| SV2B         | 6.11                           | 0.13                     | 6.7                             | 0.08                      | 0.59               | 0.04549 | NM_001167580 |
| PCDHB1       | 5.8                            | 0.08                     | 6.4                             | 0.15                      | 0.59               | 0.04862 | NM_013340    |
| TIGAR        | 6.83                           | 0.13                     | 6.23                            | 0.05                      | -0.59              | 0.03623 | NM_020375    |
| TIMM23B      | 11.99                          | 0.05                     | 11.39                           | 0.03                      | -0.6               | 0.00678 | NM_001290117 |
| SCRN3        | 7.48                           | 0.1                      | 6.88                            | 0.08                      | -0.6               | 0.03145 | NM_001193528 |

|          |       |      |       |      |       |         |                  |
|----------|-------|------|-------|------|-------|---------|------------------|
| ALPK1    | 6.74  | 0.12 | 6.14  | 0.03 | -0.6  | 0.03387 | NM_001102406     |
| C4orf50  | 7.4   | 0.15 | 6.79  | 0.06 | -0.61 | 0.04194 | BC140710         |
| SFMBT2   | 8.84  | 0.12 | 8.21  | 0.12 | -0.62 | 0.04449 | NM_001018039     |
| TEX261   | 9.62  | 0.08 | 8.99  | 0.13 | -0.62 | 0.0372  | NM_144582        |
| WRAP73   | 5.97  | 0.05 | 5.34  | 0.06 | -0.63 | 0.00917 | NM_017818        |
| INO80D   | 8.96  | 0.09 | 8.32  | 0.04 | -0.64 | 0.01626 | NM_017759        |
| PRSS21   | 6.83  | 0.01 | 6.18  | 0.09 | -0.65 | 0.02092 | NM_001270452     |
| MTRNR2L3 | 7.72  | 0.03 | 7.07  | 0.03 | -0.65 | 0.00202 | NM_001190472     |
| TNFSF18  | 5.53  | 0.09 | 4.86  | 0.05 | -0.67 | 0.01384 | NM_005092        |
| ATP11A   | 7.02  | 0.04 | 6.32  | 0.17 | -0.69 | 0.03621 | NM_015205        |
| TRPC5OS  | 5.39  | 0.05 | 4.7   | 0.05 | -0.69 | 0.00443 | NM_001195576     |
| IMPAD1   | 8.59  | 0.15 | 7.88  | 0.04 | -0.7  | 0.02756 | NM_017813        |
| ZNF763   | 8.33  | 0.19 | 7.63  | 0.1  | -0.7  | 0.04413 | NM_001012753     |
| NBPF15   | 9.28  | 0.15 | 8.59  | 0.17 | -0.7  | 0.04912 | NM_001170755     |
| TPM2     | 7.48  | 0.13 | 6.79  | 0.04 | -0.7  | 0.02175 | NM_001301226     |
| GIMAP2   | 8.25  | 0.03 | 7.54  | 0.14 | -0.71 | 0.02556 | NM_015660        |
| BNIP2    | 7.03  | 0.22 | 6.33  | 0.06 | -0.71 | 0.0479  | NM_004330        |
| FCHSD1   | 9.98  | 0.05 | 9.26  | 0.03 | -0.72 | 0.00295 | NM_033449        |
| SLC35D2  | 7.24  | 0.22 | 6.5   | 0.06 | -0.74 | 0.04229 | NM_001286990     |
| MXI1     | 11.01 | 0.16 | 10.26 | 0.18 | -0.75 | 0.04074 | NM_001008541     |
| GAS2L2   | 6.26  | 0.08 | 5.51  | 0.16 | -0.75 | 0.02658 | NM_139285        |
| ADAMTSL4 | 6.78  | 0.18 | 6.03  | 0.05 | -0.75 | 0.0288  | NM_001288607     |
| SLCO4A1  | 5.59  | 0.19 | 4.82  | 0.04 | -0.76 | 0.03118 | NM_016354        |
| UGT2B17  | 6.46  | 0.19 | 5.7   | 0.13 | -0.76 | 0.03713 | NM_001077        |
| CLEC4C   | 7.87  | 0.05 | 7.11  | 0.03 | -0.76 | 0.00246 | NM_130441        |
| ZNF211   | 9.12  | 0.03 | 8.36  | 0.04 | -0.77 | 0.00117 | NM_001265597     |
| MCTP1    | 7.45  | 0.23 | 6.67  | 0.04 | -0.78 | 0.0395  | NM_001002796     |
| RGPD5    | 10.91 | 0.05 | 10.11 | 0.17 | -0.79 | 0.02203 | NM_005054        |
| IARS     | 9.27  | 0    | 8.46  | 0.03 | -0.81 | 0.00147 | NM_002161        |
| RGPD8    | 9.98  | 0.22 | 9.16  | 0.06 | -0.82 | 0.02954 | NM_001164463     |
| KLHDC1   | 7.75  | 0.15 | 6.92  | 0.23 | -0.83 | 0.03751 | NM_172193        |
| ZFAND4   | 8.39  | 0.14 | 7.55  | 0.21 | -0.84 | 0.03099 | NM_001128324     |
| SESN3    | 7.39  | 0.17 | 6.55  | 0.1  | -0.84 | 0.02022 | NM_001271594     |
| HRAS     | 7.87  | 0.09 | 7.02  | 0.11 | -0.85 | 0.0083  | NM_005343        |
| TMA16    | 7.79  | 0.19 | 6.87  | 0.24 | -0.92 | 0.03082 | NM_018352        |
| LTB4R    | 6.94  | 0.23 | 6.02  | 0.11 | -0.92 | 0.02352 | NM_001143919     |
| AGPAT4   | 6.93  | 0.19 | 5.99  | 0.21 | -0.94 | 0.02488 | NM_020133        |
| SNX5     | 8.08  | 0.15 | 7.12  | 0.04 | -0.96 | 0.00869 | hsa_circ_0008446 |
| IL21R    | 5.85  | 0.08 | 4.88  | 0.09 | -0.97 | 0.003   | NM_021798        |
| FKBP5    | 9.79  | 0.38 | 8.72  | 0.21 | -1.08 | 0.03332 | NM_001145775     |
| RGPD6    | 10.15 | 0.18 | 9.03  | 0.12 | -1.12 | 0.00718 | NM_001037866     |
| DYNLT1   | 11.99 | 0.21 | 10.86 | 0.33 | -1.13 | 0.0236  | NM_001291602     |
| NLRP3    | 9.01  | 0.44 | 7.87  | 0.34 | -1.15 | 0.04124 | NM_001079821     |
| GPR132   | 10.01 | 0.92 | 8.13  | 0.9  | -1.88 | 0.03138 | NM_001278694     |
